# Supplementary material for: A Comprehensive Analysis of Key Immune Checkpoint Receptors on Tumor-Infiltrating T Cells From Multiple Types of Cancer
Source: Front Oncol. 2019 Oct 25;9:1066. doi: 10.3389/fonc.2019.01066 (PMC6823747; doi:10.3389/fonc.2019.01066)
Supplement: Supplementary file 2 [file Table_2.xlsx]

## Sheet: Sheet1
Flow cytometric panels for the study
Panel acted from December 2012 to July 2014
Exhaustion Panel-1
Marker	Fluorophore	Catalog No.	Manufacturer	Clone
CD3	Alexa Fluor 700	344822	Biolegend	SK7
CD4	FITC	345768	BD	SK3
CD8	APC-H7	560179	BD	SK1
CTLA-4	PE-cy7	349914	Biolegend	L3D10
Tim3	BV421	345008	Biolegend	F38-2E2
KLRG-1	BV605	138419	Biolegend	2F1/KLRG-1
2B4	APC	329512	Biolegend	C1.7
Aqua L/D staining	BV510	L34957	Life Technologies
Panel acted from December 2012 to July 2014
Exhaustion Panel-2
Marker	Fluorophore	Catalog No.	Manufacturer	Clone
CD3	Alexa Fluor 700	344822	Biolegend	SK7
CD4	FITC	345768	BD	SK3
CD8	APC-cy7	560179	BD	SK1
CD160	PE-cy7	341212	Biolegend	BY55
BTLA (CD272)	APC	344510	Biolegend	MIH26
PD-1	BV650	564104	BD	EH12.1
Aqua L/D staining	BV510	L34957	Life Technologies
Panel acted from December 2014 to date
Marker	Fluorophore	Catalog No.	Manufacturer	Clone
CD3	Alexa Fluor 700	344822	Biolegend	SK7
CD4	FITC	345768	BD	SK3
CD8	APC-H7	560179	BD	SK1
CTLA-4	PE-Cy7	349914	Biolegend	L3D10
Tim3	BV421	345008	Biolegend	F38-2E2
KLRG-1	BV605	138419	Biolegend	2F1/KLRG-1
2B4	APC	329512	Biolegend	C1.7
PD-1	BV650	564104	BD	EH12.1
TIGIT	PE	12-9500-42	eBioscience	MBSA43
CD27	PERCP5.5	356407	Biolegend	M-T271
CD45RA	BV785	304139	Biolegend	HI100
CCR7	BV711	353227	Biolegend	G043H7
CD56	PE-Dazzle594	318347	Biolegend	HCD56
Aqua L/D staining	BV510	L34957	Life Technologies
